# Supplementary material
Source: Springer Nature journal article supplement (https://www.springermedizin.de/resource/supplementary/12991_2012_1372_MOESM1_ESM.pdf/9613838)

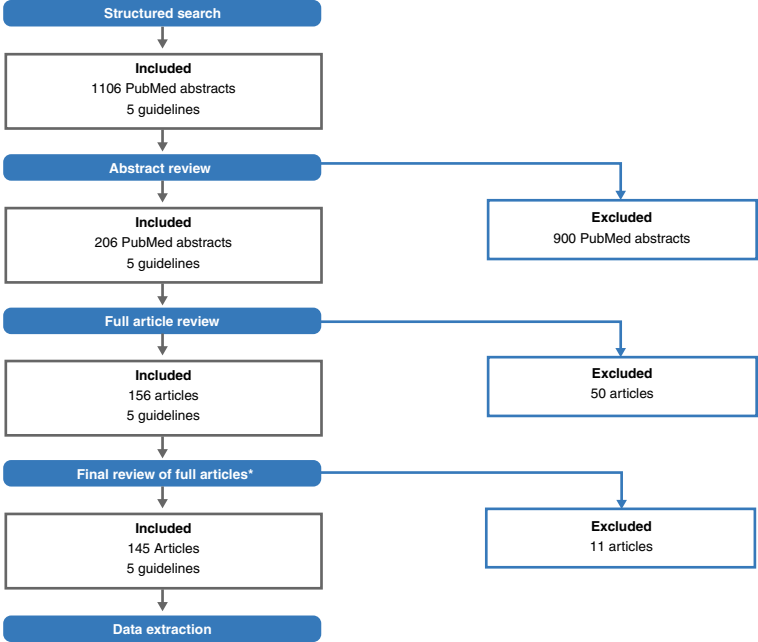

Supplement: MOESM1 [file 9613838]
